1                                    Vertical transmission of tissue microbiota in *Caenorhabditis elegans*

2                                    Jun Zheng<sup>1,2</sup>, Xin Meng<sup>1,2</sup>, Jiahao Fan<sup>1</sup>, and Dong Yang<sup>1,\*</sup>

3        <sup>1</sup>Beijing Key Laboratory of Functional Food from Plant Resources, College of Food Science &  
4        Nutritional Engineering, China Agricultural University, Beijing, China

5        <sup>2</sup>These authors contributed equally: Jun Zheng, Xin Meng

6        \*e-mail: dyang@cau.edu.cn

7        **Abstract**

8        The past forty-five years has witnessed *Caenorhabditis elegans* as the most significant model  
9        animal in life science since its discovery seventy years ago<sup>1,2</sup>, as it introduced principles of gene  
10       regulated organ development, and RNA interference into biology<sup>3-5</sup>. Meanwhile, it has become  
11       one of the lab animals in gut microbiota studies as these symbionts contribute significantly to many  
12       aspects in host biology<sup>6,7</sup>. Meanwhile, the origin of gut microbiota remains debatable in human<sup>8-</sup>  
13       <sup>11</sup>, and has not been investigated in other model animals. Here we show that the symbiont bacteria  
14       in *C. elegans* not only vertically transmit from the parent generation to the next, but also distributes  
15       in the worm tissues parallel with its development. We found that bacteria can enter into the  
16       embryos of *C. elegans*, a step associated with vitellogenin, and passed to the next generation. These  
17       vertically transmitted bacteria share global similarity, and bacterial distribution in worm tissues  
18       changes as they grow at different life stages. Antibiotic treatment of worms increased their  
19       vulnerability against pathogenic bacteria, and replenishment of tissue microbiota restored their  
20       immunity. These results not only offered a molecular basis of vertical transmission of bacteria in  
21       *C. elegans*, but also signal a new era for the mixed tissue cell-bacteria multi-species organism  
22       study.

23 Gut microbiota plays a vital role in many aspects of host physiology, and becomes more so as  
24 research inputs increases<sup>12</sup>. The sterile womb doctrine deduces that human gut microbes are  
25 established after delivery<sup>13,14</sup>. However, once the gut microbiota lost its richness due to unbalanced  
26 diet or antibiotic treatment, it seems impossible to restore them by supplementing the host with  
27 routine nutritional interventions<sup>15</sup>. This raises the questioning that environment could not reseed  
28 bacteria into the gut, and ultimately leads to the tracing back of these bacteria in an individual:  
29 what is their origin? Efforts have been tried to find evidences for vertical bacterial transmission  
30 via human umbilical cord blood, amniotic fluid, or placenta<sup>8-10</sup>. Meanwhile, new evidences point  
31 out bacteria in the placenta are merely contaminations in the sample collection process, laboratory  
32 reagents, or sequencing instrument<sup>11</sup>. Owing to the bacterial world we are residing in, it seems  
33 impossible to prove the sterility of any tissue under current experimental conditions<sup>16</sup>.

34 *C. elegans* has been used as the animal model for many studies, including genetic  
35 regulation of organ development and programmed cell death, RNA interference, and development  
36 of green fluorescent proteins<sup>3-5,17</sup>. And it has been recently employed in the gut microbiome  
37 research<sup>6,7,18,19</sup>. Microbiota in worms from different microbial environments resembles each other  
38 and share a core flora<sup>20</sup>, and the bacterial composition is influenced by their developmental stage  
39 and genotype<sup>21</sup>. The diverse worm microbiota exhibits significant heterogeneity within *E. coli*  
40 species that affect host longevity via communicating with colonic acid<sup>22</sup>. Growing in the lab for  
41 decades on monoxenic cultures (mostly *E. coli* OP50), the N2 wild type worm harbors some  
42 bacteria (genus *Exiguobacterium*, *Mucilaginibacter*, and *Virgibacillus*) that does not exist in the  
43 produce enriched, native microbiota restored soil<sup>20</sup>. Thus, a similar question arises that where are  
44 the worm gut bacteria from except *E. coli*?

45 Taking advantage of many technical conveniences with nematode *C. elegans* as the model  
46 animal, we first tried to examine whether there is a vertical transmission of bacteria in this model  
47 as in many other animals<sup>23</sup>. Here we found there is not only core bacteria in the nematode embryo  
48 but also in its tissues, and these tissue microbiota plays an important role in host defense against  
49 pathogenic bacteria. Additionally, the maternal transmission of tissue microbiota is associated with  
50 vitellogenin, probably during the embryo formation process.

51 **Embryo microbiota of *C. elegans***

52 To verify the maternal transmission of bacteria in *C. elegans*, one has to prove there are  
53 bacteria in the worm embryo as previously verified in *Haemonchus contortus*<sup>24</sup>. The traditional  
54 bacteria probe Eub338 was used in this study<sup>25</sup>, and it is examined capable of visualizing both  
55 gram-negative and -positive bacteria with different efficiency though (Extended Data Fig.1a-b)<sup>26</sup>.  
56 We found there are bacteria inside the *C. elegans* embryo *in situ*, most likely intercellular ones  
57 (Fig.1a-b, Supplementary Video 1). Isolated, surface sterilized embryo also identified the presence  
58 of bacteria within it (Supplementary Video 2)

59 We sequenced the 16S rRNA gene in the isolated embryo and the N2 laboratory worms in  
60 our lab, and compared with these from the worm gut microbiome available to date<sup>20,21</sup>. Principle  
61 coordinate analysis indicated the gut microbiota of worms from China, France, Germany, Portugal,  
62 and the U.S. mainly clustered according to their geographic origin (Fig. 1c-d). Interestingly,  
63 microbiota in the embryo clustered centering among these global worms, indicating a universal  
64 similarity of bacteria in the embryo with these in the worms. Although no common OTUs were  
65 observed among all worms (Fig.1e), there are 43 common genera between worms from different  
66 continent and the embryos (Fig.1f). Microbiota composition analysis indicated that  
67 Enterobacteriales, Pseudomonadales, and Burkholderiales are the common orders among all the  
68 samples (Fig.1g)

### 69 **Tissue microbiota of *C. elegans***

70 Routine FISH processing enabled us to visualize the gut bacteria localized along the  
71 intestine (Extended Data Fig.2a-b, Supplementary Video 3), with the same pattern as the ingested,  
72 red fluorescent protein labelled *E. coli* (Extended Data Fig.2c-d, Supplementary Video 4-6).  
73 Interestingly, there are also bacteria detected at the oocyte and spermatheca (Extended Data Fig.3,  
74 Extended Data, Supplementary Video 1,7). To distinguish the gut bacteria and these in worm  
75 tissues, much effort was devoted to optimize the FISH procedure (Additional Discussion 1). We  
76 found that bacteria in the worm gut could be removed by washing (Extended Data Fig.4), and  
77 FISH procedure on worms with their tails cut off improves visualization of bacteria in worm tissues  
78 while the wound did not allow foreign bacteria entering into the worm tissue (Extended Data Fig.5).

79 Sex dependent FISH procedure enables us to clearly localize tissue bacteria distribution.  
80 For hermaphrodites, the probe was incubated with worms at 80°C then 37°C, followed by washing  
81 at 37°C (see methods for detail). This enabled us to visualize bacteria not only in the embryos but

82 also in different tissues (Extended Data Fig.6). In the gut microbiota removed hermaphrodites,  
83 bacteria were seen in the pharynx, body wall muscle, and embryos (Fig. 2a, c, Extended Data  
84 Fig.7). However, this procedure only permits visualization of bacteria in the male worm  
85 spermatheca (Extended Data Fig.8). For male worms, optimized FISH procedure was incubating  
86 the probe with worms at 46°C followed by washing at 48°C. This allowed us not only localize  
87 bacteria in the spermatheca but also in the pharynx and body wall muscle (Fig. 2b, d, Extended  
88 Data Fig.9). However, hermaphrodites performed with the later FISH setup barely detects bacteria  
89 in the embryos (Extended Data Fig.10).

90 To further localize bacteria in worm tissues, correlative light and electron microscopy  
91 (CLEM) was applied to detect tissue bacteria in *C. elegans*. Briefly, digoxin labelled nucleic acid  
92 probe was used to hybridize *in situ* with tissue bacteria in the gut microbiota free, tail cut worms.  
93 These worms were then subjected to ultrathin sectioning, labelled with fluorescent anti-digoxin  
94 antibody, and observed sequentially with confocal light microscopy and electron microscopy  
95 (Extended Data Fig.11). Proof-of-concept experiment was performed with both gram-negative and  
96 -positive bacteria (Extended Data Fig.12a-c), and this procedure unequivocally prevents  
97 contamination of foreign bacteria into the worm tissue during experimental operation (Additional  
98 Discussion 2). CLEM helped us identified bacteria inside the embryo (Fig.2e, Extended Data  
99 Fig.12d) in hermaphrodites and inside the sperm cells in male worm gonad and yolk (Fig.2f,  
100 Extended Data Fig.12e).

101 We then tried to visualize the tissue microbiota distribution dynamics during *C. elegans*  
102 development. Bacteria seemed occupying all over the worm body at the L1 stage (Extended Data  
103 Fig.13a-b, Extended Data Fig.14a-b, Supplementary Video 8), and the tissue microbiota became  
104 less populated at the L2 stage (Extended Data Fig.13c-d). The tissue bacteria continued to vanish  
105 at the L3 (Extended Data Fig.13e) and L4 stages (Extended Data Fig.13f), with a few left in the  
106 lateral tissues (Extended Data Fig.14c-d, Supplementary Video 9). Our images did not allow us  
107 for more precise description of the tissue microbiota distribution.

### 108 **Tissue microbiota assisted worm immunology**

109 To examine the physiological significance of tissue microbiota, we isolated the *C. elegans*  
110 embryos and soaked them with different antibiotics before they entered into the L1 stage, by which  
111 the gut microbiota is not involved in this intervention. Worm growth under the pathological

112 *Enterococcus faecalis* challenging did not yield significant differences between those treated with  
113 saline and ampicillin or chloramphenicol, while these treated with kanamycin exhibited  
114 significantly shortened lifespan (Log-rank test,  $P < 0.05$ , Extended Data Fig.15). The more  
115 challenging pathological *Pseudomonas aeruginosa* was applied<sup>27</sup>, and it was found that worms  
116 treated with kanamycin and chloramphenicol both exhibited significant shortened life span  
117 compared with these treated with saline and ampicillin (Log-rank test,  $P < 0.05$ , Fig.3a). Worm  
118 tissue microbiota were sequenced, and PCoA indicated that tissue microbiota of saline treated  
119 worms almost overlapped with ampicillin treated one while kanamycin and chloramphenicol  
120 treated ones deviated from others (Fig.3b).

121 To further prove the role tissue microbiota played in *C. elegans* immune system, we  
122 replenished bacteria from worms to these treated with different antibiotics. It was found that the  
123 life span differences between worms treated with kanamycin and chloramphenicol, and these  
124 treated with saline and ampicillin disappeared (Fig.3c). PCoA indicated that the tissue microbiota  
125 of antibiotic treated, then bacteria replenished worms clustered closer to the saline treated ones  
126 (Fig.3d). Bacteria analysis indicated that the relative abundance of orders Bacillales,  
127 Sphingomonadales, and Burkholderiales increased after kanamycin treatment and decreased after  
128 following tissue bacteria replenishment. While those of orders Clostridiales, Erysipelotrichales,  
129 Bacteroidales, Brocadiiales, and Rhodocyclales decreased after kanamycin treatment and increased  
130 after bacteria replenishment. Meanwhile, the relative abundance of orders Bacillales and  
131 Burkholderiales increased after chloramphenicol treatment and decreased after following bacteria  
132 replenishment. While those of orders Clostridiales, Erysipelotrichales, Bacteroidales, Brocadiiales,  
133 and Lactobacillales decreased after chloramphenicol treatment and increased after following  
134 bacteria replenishment (Fig.3e-f). It is worthy to mention that the antibiotic treatment did not  
135 permanently alter the worm tissue microbiota as they restored after couple of generations  
136 (Extended Data Fig.16)

### 137 ***Vit-2* associated tissue microbiota vertical transmission**

138 We often observed the cooccurrence of bacteria with the yolk in the embryo, thus it was  
139 speculated that yolk component might be involved in the vertical transmission of tissue microbiota.  
140 It was reported that vitellogenin in fish binds to bacteria as a multivalent pattern recognition  
141 receptor<sup>28</sup>, thus we turned to RNA interference on the yolk protein yp170B, the protomer of the

142 homodimeric yolk lipoprotein complex to examine its role in bacterial vertical transmission<sup>29</sup>. For  
143 the F0 generation on which the RNAi was applied, there is no significant differences between life  
144 spans of worms supplied with *E. coli* OP50, *E. coli* HT115, *E. coli* HT115 harboring empty vector,  
145 or *E. coli* HT115 harboring RNAi plasmid under pathogenic *Pseudomonas aeruginosa* challenging  
146 (Fig.4a). PCoA of tissue microbiota indicated the almost overlapped clustering between RNAi  
147 treated and control group (Fig.4b), and composition analysis showed that there was no significant  
148 difference between species at the order level (Fig.4c).

149 However, in the progeny F1 generation under the same pathogen challenging, RNAi treated  
150 *C. elegans* exhibited significant shortened life span compared with control worms (Fig.4d). PCoA  
151 indicated tissue microbiota clustering of these two groups deviated from each other as compared  
152 with the F0 generation (Fig. 4e). Among orders with most intensive relative abundance changes,  
153 relative abundance of orders Enterobacteriales, Sphingomonadales increased in the RNAi treated  
154 worms compared with these supplied with *E. coli* HT115 while these of orders Clostridiales,  
155 Lactobacillales, Burkholderiales, Erysipelotrichales decreased (Fig. 4f). Again, we replenished  
156 tissue bacteria to a parallel batch of F1 worms, and found that their life span discrepancy under  
157 pathogenic challenging disappeared (Fig.4g). Their tissue bacterial composition is to certain extent  
158 restored to the F0 generation thus microbiota clustering overlapped closer (Fig. 4h). Relative  
159 abundance of Enterobacteriales, Sphingomonadales decreased in the RNAi worms replenished  
160 with tissue bacteria while these of orders Clostridiales, Lactobacillales, Burkholderiales,  
161 Erysipelotrichales increased (Fig. 4i).

## 162 Discussion

163 Bacteria were detected in the eggs, the intestinal epithelia and oocytes of nematodes  
164 *Xiphinema brevicollum* and *Xiphinema americanum*<sup>30</sup>, in the gut, uterus, tissue, and inside the eggs  
165 of adult nematode *Haemonchus contortus*<sup>24</sup>, and in the ovary of nematode *Acrobeles sp.*<sup>31</sup>. Our  
166 results showed that in the model animal *C. elegans*, there is bacteria in the embryo with shared  
167 core species to be passed to their progeny. Specific interest into detection of tissue bacteria rose  
168 when we observed detection of bacteria in the spermatheca and embryos with EUB338, and in the  
169 ovary as reported<sup>31</sup>. As the obligate intracellular bacteria *neorickettsia spp.* reported to be  
170 maintained within all life cycle stages of another laboratory model *Plagiiorchis elegans*<sup>32</sup>, and here  
171 we also observed intracellular EUB338 signal in *C. elegans* in its various tissues. Vitellogenin is

172 synthesized in the intestine and transported into maturing oocytes by endocytosis<sup>33</sup>, and it is also  
173 capable of binding bacteria<sup>28</sup>. Our results indicated vitellogenin is associated with bacterial vertical  
174 transmission, as the worm immuno-compromise brought by RNAi treatment on vitellogenin only  
175 occurs in the progeny generation and could be restored by microbiota replenishment. Vit-2 protein  
176 distributes all over the worm tissues as yolk accumulates<sup>34</sup>, and so are the bacteria it binds as we  
177 observed.

178 Subgroups of *Pseudomonas fluorescens* inhibits pathogen growth<sup>35</sup>, *Bacillus megaterium*  
179 enhanced worm immunology via decreasing worm reproduction, and *Pseudomonas mendocina*  
180 did so associated with *pmk-1*-dependent immune gene expression<sup>36</sup>. Although these above bacteria  
181 help host against pathogens in different mechanisms, no evidence shows they are functioning in  
182 the worm gut cavity. Despite vitellogenin assisted *C. elegans* immunology against pathological  
183 bacteria via the steroid-signal pathway<sup>37</sup>, here we find vertical transmission and tissue distribution  
184 of *Pseudomonas fluorescens*, another subgroup of which exhibit immunology depends on host-  
185 mediated mechanisms<sup>35</sup>. It is highly likely this subgroup is functioning in the worm tissue via  
186 communication with *C. elegans* cells.

187 Differential vitellogenin provisioning is responsible for phenotypic variation in the  
188 isogenic *C. elegans* whilst the mechanism remains unknown<sup>38</sup>. Here we identified that vitellogenin  
189 is associated with vertical transmission of tissue bacterial to the progeny which could profoundly  
190 impact animal immunity, and possibly other physiology. Traditionally viewed as an autonomous  
191 process directed by the genome solely, animal development now appeals a reexamination in the  
192 presence of hologenomes as a holobionts<sup>16,39,40</sup>.

## 193 **Methods**

194 ***C. elegans* and bacteria.** The wild-type N2 *C. elegans* were maintained on standard nematode  
195 growth medium (NGM) seeded with *Escherichia coli* OP50 as previously described, except the  
196 temperature was set at 20°C<sup>2</sup>. Both the worm and the OP50 cells were kindly provided by Prof.  
197 Guangshuo Ou at Tsinghua University. *E. Coli* BL21 constitutively expressing red fluorescence  
198 protein (RFP) was kindly provided by Prof. Yanling Hao at China Agricultural University in which  
199 sequence coding red fluorescence protein was inserted between the restriction nuclease site *NcoI*  
200 and *BamHI* of a pET9d plasmid. *Enterococcus faecalis* ATCC 29212 was purchased from China  
201 General Microbiological Culture Collection Center. *Pseudomonas aeruginosa* PA14 was kindly

202 provided by Dr. Kun Zhu in the Institute of Microbiology, Chinese Academy of Sciences. *E. coli*  
203 HT115 strain was purchased from Shanghai Weidi Biotechnology Co., Ltd (Shanghai, China).

204 **Gut microbiota positioning.** RFP labeled *E. Coli* was inoculated in the LB medium and cultured  
205 overnight. On a 60 mm NGM dish, 50 $\mu$ L of the above *E. Coli* was seeded at 37°C for 5-8 hours.  
206 Around 100 *C. elegans* adult worms were picked and maintained on the above lawn for one day,  
207 and then hermaphrodites and male worms were separately picked, washed with M9 buffer once  
208 and 1 $\times$ PBST buffer three times. Worms were then heat-shocked at 60°C for 1 min before collected  
209 by centrifugation. For 10 $\mu$ L of the worm sample, add 5 $\mu$ L anti-fading mounting medium with 5 $\mu$ L  
210 4',6-diamidino-2-phenylindole (DAPI, Solarbio Life Sciences, Beijing China), transfer to a slide  
211 and cover with a glass coverslip. To prevent evaporation of the mounting solution, the edges of  
212 the cover glass was sealed with nail polish (OPI Products Inc., N. Hollywood, CA, USA).

213 **Removal of gut bacteria by washing.** Worms were collected by flushing with M9 buffer, washed  
214 with 1 $\times$ PBST buffer three times, and heat-shocked at 60°C for 1 min. Worms were then collected  
215 by centrifugation, incubated in 1mL 4% PFA for 45min on a rocking shaker, washed three times  
216 with 1 $\times$ PBST buffer, resuspended in 1mL 1 $\times$ PBST buffer, and washed on a rocking shaker at for  
217 0h, 1h, or 2h, respectively. The worms were collected by centrifugation, washed again with fresh  
218 1 $\times$ PBST buffer, and subjected to DNA probe *in situ* hybridization as described in the following.

219 **Nucleic acid probe in situ hybridization.** In this study, two types of nucleic acid probes were  
220 used. Fluorescent probe for direct confocal microscopic observation, Eub338 (5'-  
221 GCTGCCTCCCGTAGGAGT-3')<sup>26</sup> with Alexa Fluor 488 dye covalently linked to its 5' end,  
222 which detects almost all bacteria, was synthesized by Sangon Biotech Co., Ltd. (Shanghai, China).  
223 The other probe used in the following CLEM experiment was Eub338 with digoxin covalently  
224 attached to its 5' end (Sangon Biotech, Shanghai, China).

225 Routine hybridization procedure is as the following. Hermaphrodites and male worms were  
226 separately picked, washed with 1 $\times$ PBST buffer three times, and heat-shocked at 60°C for 1 min.  
227 Worms were collected by centrifugation, incubated in 1mL 4% PFA for 45min on a rocking shaker,  
228 washed three times with 1 $\times$ PBST buffer, resuspended in 100 $\mu$ L hybridization buffer (900mM  
229 NaCl, 20mM Tris-Cl pH7.2, 0.01% SDS, 20% formamide), and transferred to a 200 $\mu$ L PCR tube  
230 pre-rinsed with hybridization buffer containing 0.5% Tween-20. The DNA probe was added to a  
231 final concentration of 1 $\mu$ M, and the animals were stained at 46°C for 1.5h on a rocking shaker for



232 male, or 80°C in a water bath for 30min and then 37°C on a rocking shaker for 1.5h for  
233 hermaphrodites. Worms were collected by centrifugation and washed on a rocking shaker with  
234 cleaning solution (180mM NaCl, 20mM Tris-Cl pH7.2, 0.01% SDS) at 48°C for 30min for male,  
235 and 37°C for 30min for hermaphrodites. Worms were washed again with the cleaning solution,  
236 and collected by centrifugation. For 10µL sample, add 5µL of anti-fading mounting medium with  
237 5µL DAPI, transfer to a slide and cover with a glass coverslip. To prevent evaporation of the  
238 mounting solution, the edges of the cover glass was sealed with nail polish (OPI Products Inc., N.  
239 Hollywood, CA, USA). Worms at different development stage, isolated worm embryos, or bacteria  
240 (Bacteria *E. coli* OP50 and *E. faecalis* ATCC 29212) were following the FISH procedure for male.

241 For tissue microbiota FISH experiment, the tail of each worm was cut off with a scalpel under  
242 a compact stereo microscope (Olympus SZ61, Japan). Worms were then collected and washed  
243 with 1×PBST buffer as inspired by a previous study<sup>41</sup>. These steps were performed after the PFA  
244 fixation and PBST cleaning, but before the hybridization buffer addition.

245 The DNA probe hybridized samples were subjected to confocal microscopic imaging (with  
246 DAPI) or embedding according to the DNA probe used.

247 **Foreign bacterial contamination test.** The RFP labelled *E. coli* was cultured, collected by  
248 centrifugation, washed three times with 1×PBST buffer, and used to substitute the DNA probes in  
249 the above *in situ* hybridization procedure for male. After the cleaning step, anti-fading mounting  
250 medium with DAPI were added and the sample were covered with a glass coverslip for confocal  
251 microscopic observation.

252 **Ultrathin section preparation.** In the high-pressure freeze (HPF) procedure, samples were  
253 carefully loaded into a type A specimen carrier (200-µm well) containing 10% BSA in M9 buffer,  
254 and covered with a top hat with a thin coating of 1-hexadecane. The two carriers were hold firmly  
255 together, and loaded into the sample holder for HPF (Leica HPM100, Germany). Following HPF,  
256 the fast-frozen samples were immersed into a freezing tube containing 1% osmium tetroxide in  
257 100% acetone, and placed into the freeze substitution (FS) device (Leica EM AFS, Germany) with  
258 the following parameters: T1 = -90°C for 60 h, S1 = 3°C/h, T2 = -60°C for 10 h, S2 = 3°C/h, T3  
259 = -30°C for 14 h, then slowly warmed to 4°C (4°C/h). Following FS, samples were rinsed three  
260 times in 100% acetone, 15 min each at 4°C, and once again at room temperature. Samples were  
261 then transferred into a new 2ml Eppendorf tube and infiltrated in a graded mixture (1:5, 1:3,1:1,

262 3:1) of resin (SPI, Resin Mixture: 16.2 ml SPI-PON812, 10 ml DDSA, 10 ml NMA, 1.5%BDMA)  
263 and acetone mixture, then changed to 100% resin four times for 2 days on rotator. Finally, samples  
264 were embedded and polymerized 12h at 45°C, and 48h at 60°C. The ultrathin sections (200nm  
265 thick) were sectioned with microtome (Leica EM UC7) on a glass slide.

266 **Ultrathin section labelling.** Under a microscope, the ultrathin section was moved to a glass slide  
267 with 200µL 1mg/mL BSA solution with the Perfect loop (70940, Head Biotechnology Co., Ltd.,  
268 Beijing, China) and incubated for 30min at room temperature. Then the section was moved to  
269 another glass slides with 100µL, 1µM anti-digoxin antibody in 1×PBS buffer and incubated at 37°C  
270 for 3h. The section was then moved to another glass slide with 200µL, 1mg/mL BSA and incubated  
271 for 10min, before finally to a glass slide with 200µL H<sub>2</sub>O for 10min. The stain and washed section  
272 was then moved to a cover slide with 50µL H<sub>2</sub>O, air-dried at room temperature, and subjected to  
273 confocal microscopic and electron microscopic observation.

274 **Confocal microscopy and imaging analysis.** Alexa Fluor 488, DAPI, and RFP signal  
275 distributions in the worm were captured with an inverted Olympus FV1000 confocal microscope  
276 system with 10× and 60× objectives, or Zeiss LSM980 confocal microscope system with 40×, 63×  
277 and 100× 1.40-NA objectives. The excitation wavelength was set at 488/488nm, 405/405nm, and  
278 635/594nm with FV1000/LSM980 for Alex Fluor488, DAPI, and RFP signal, respectively. For  
279 3D visualization, acquisition was performed in 0.5 or 1 µM z-steps depending on the thickness of  
280 the specimen, and the Imaris software package (Bitplane AG, Zurich, Switzerland) was used to  
281 visualize z-stack, reconstruction of the 3D architecture of the samples and video production.

282 **Scanning electron microscopy.** Ultrathin sections were double stained with uranyl acetate and  
283 lead citrate, coated with carbon in a high vacuum evaporator (Denton Vacuum 502B, NJ, USA),  
284 and examined on a scanning electron microscope (FEI Helios Nanolab 600i, Oregon, USA) in the  
285 immersion high magnification mode with a CBS detector at 2kV and 0.6nA. For CLEM, the light  
286 microscopy images and electron microscopy images of the same area were carefully aligned.

287 **Antibiotic treatment.** On an NGM plate with majority of adult hermaphrodites harboring eggs,  
288 the worms were collected by flushing M9 buffer to the plates, transferred to a sterile centrifuge  
289 tube, and washed three times with M9 buffer. The residual suspension of worms in 100µL M9  
290 buffer was added sequentially with 600µL the same buffer, 100µL 5M NaOH solution, and 200µL  
291 NaClO solution (10% available chlorine), inverted vigorously until all worms lysed, and

292 centrifuged at 1300×g for 1 min. The embryos were washed with M9 buffer until pH neutral and  
293 resuspended in 400μL buffer.

294 M9 buffer of 3 mL was added to pre-rinsed 60 mm petri dishes, and 6μL of each 100g/mL  
295 saline, ampicillin, kanamycin, and chloramphenicol (Shanghai Macklin Biochemical Co., Ltd.,  
296 Shanghai, China) solutions was added to the solution for a final concentration of 200μg/mL,  
297 respectively. The embryos in different solutions were incubated at 20°C for hatching. The solutions  
298 were then transferred to centrifuge tubes after 24 hours, centrifuged at 1300×g for 2 min, and the  
299 supernatant was discarded. Worms at L1 stage were washed three times with M9 buffer,  
300 resuspended in M9 buffer and transferred to NGM plates, and referred as the F0 generation. The  
301 F0 generation was removed from the plates by gently flushing the plates with M9 medium after  
302 they laid the embryos, and the offspring was referred as the F1 generation and transferred to new  
303 NGM plates. Similarly, the offspring of the F1 generation was referred as the F2 generation. F0  
304 worms at L4/young adult stage were subjected to life span assay as described in the following. F0,  
305 F1, and F2 worms were subject to tissue microbiota analysis.

306 **RNA interference.** The pUC57 plasmid harboring sequences targeting the *vit2* gene was  
307 synthesized in Tsingke Biological Technology, Beijing, China (Supplementary information),  
308 transformed into the DH5α *E. coli* cell (TransGen Biotech, Beijing, China) and amplified,  
309 extracted and digested with *Hind* III and *Xho* I restriction enzymes (Takara Biomedical  
310 Technology, Co., Ltd., Beijing, China). The L4440 linear vector (MiaoLing Plasmid Sharing  
311 Platform, Wuhan, China) was digested with the same restriction enzymes, mixed with the *vit2*  
312 sequences in equal molar ratio, and mixed with the T4 ligase (Vazyme Biotech Co. Ltd., Nanjing,  
313 China) before incubation at 16°C for 1h. The ligation product was transformed into the DH5α cell  
314 and single colonies were sequenced at Tsingke Biological Technology, Beijing, China. Cells  
315 harboring correct plasmid were cultured and pL4440-*vit2* was extracted with the TIANprep Mini  
316 Plasmid Kit (Tiangen Biotech Co. Ltd., Beijing, China). Meanwhile, the empty pL4440 plasmid  
317 was prepared. The pL4440 and pL4440-*vit2* plasmids were heat-shock transferred into the HT115  
318 (DE3) competent cells (Shanghai Weidi Biotechnology Co., Ltd., Shanghai, China), respectively.  
319 HT115 cells harboring pL4440 or pL4440-*vit2*, were all cultured in LB medium containing  
320 50μg/mL ampicillin, and HT115 cells harboring no plasmids were also plated, then cultured on  
321 LB medium. The RNAi plates were made by seeding these cultures on the NGM plates containing

322 4mM isopropyl- $\beta$ -d-thiogalactopyranoside (IPTG, Shanghai Macklin Biochemical Co., Ltd.,  
323 Shanghai, China), culturing at 37°C for 48h.

324 Worm embryos were obtained by the above bleaching method, washed to pH neutral, added  
325 to each RNAi plate, incubated at 20°C and referred as the F0 generation. The F0 worms were  
326 gently removed from the plates by flushing with M9 medium, and the left embryos were collected,  
327 washed, transferred to NGM plates for hatching, and referred as the F1 generation. F0 or F1 worms  
328 at L4/young adult stage were subjected to life span assay as described in the following, and tissue  
329 microbiota analysis.

330 **Somatic bacteria replenishment.** Worms at L4 stage were collected by flushing them from the  
331 NGM plates with M9 buffer, centrifuged to remove the supernatant buffer, washed three times  
332 with the M9 buffer, grinded with a sterilized grinding rod (rinsed with 10% hydrochloric acid  
333 overnight, washed to pH neutral, and pasteurized at 121°C for 20min). The grinding-lysed worms  
334 examined with no intact animals were spread over the NGM plates (covered with OP50 *E. coli*).  
335 Replenishment was performed by transferring the antibiotic treated worm embryos (the F0  
336 generation), or the embryos of the RNAi treated worms (the F1 generation) to the above NGM  
337 plates containing tissue bacteria and cultured at 20°C till the worms developed to the L4/young  
338 adult stage for the following lifespan assay, and tissue microbiota analysis.

339 **Lifespan assays.** Worm life span assays were performed at 20°C. Synchronization of worm  
340 populations was performed by placing L4/young adult worms (treated with antibiotics, RNAi, or  
341 the F1 generation of RNAi treated worms) on NGM plates seeded with *Enterococcus faecalis*  
342 ATCC 29212 or *Pseudomonas aeruginosa* PA14. Worms were changed to new plates every day  
343 for elimination of confounding progeny and were marked as alive or dead. Worms were scored  
344 every 12/24 hours, counted as dead if they did not respond to repeated prods to with a platinum  
345 pick, and censored if they crawled off the plate or died from vulval bursting. In each life span  
346 assay, 50-60 worms were allowed to grow in a plate, and the assays were repeated for triplicates.  
347 The data were plotted into the Kaplan-Meier Survival curves with GraphPad Prism, and the  
348 statistical significance was determined by Mantel-Cox Log-rank.

349 **Microbiota DNA isolation and 16S rRNA sequencing.** Worms or isolated embryos were washed  
350 3 times with M9 buffer before subjected to whole microbiome extraction with the Rapid Soil DNA  
351 Isolation Kit (Sangon Biotech, Shanghai, China) according to manufacturer's instruction. Worms

352 were washed 3 times with M9 buffer, incubated with 4% PFA on a rocking shaker for 45min, then  
353 washed again with water for 3 times, incubated in water on a rocking shaker for 2 hours, and finally  
354 washed with water once before tissue microbiome extraction with the same DNA isolation kit.  
355 Amplification of the V3-V4 region of the 16S rRNAs of the microbiota were performed with the  
356 barcoded primers 336F (5'-GTACTCCTACGGGAGGCAGCA-3') and 806R (5'-  
357 GTGGACTACHVGGGTWTCTAAT-3'). The PCR reaction contains a total of 20 $\mu$ L volume  
358 1 $\times$ FastPfu buffer, 10ng template DNA, 250 $\mu$ M dNTP, 0.1 $\mu$ M each above primer, and 1 U FastPfu  
359 DNA polymerase (TransGen Biotech, Beijing, China). PCR was performed at 95 $^{\circ}$ C for 2 min,  
360 followed by 30 cycles of 95 $^{\circ}$ C for 30s, annealing at 55 $^{\circ}$ C for 30s, 72 $^{\circ}$ C for 30s and a final extension  
361 at 72 $^{\circ}$ C for 5 min. The amplicons were detected with 2% agarose gel electrophoresis and purified  
362 with AxyPrep DNA Purification kit (Axygen Biosciences, Union City, CA, USA). Purified  
363 amplicons were pooled in equal molar and paired-end sequenced (2 $\times$ 300) on an Illumina MiSeq  
364 platform (Illumina Inc., San Diego, CA, United States) at Allwegene Technology Inc. (Beijing,  
365 China).

366 **Microbiota analysis.** The sequence files from Berg et. al. was downloaded from  
367 <http://metagenomics.anl.gov/>, referred to Orange enriched worms from US (OUS1-3), Potato  
368 enriched worms from US (PUS1-3), and Banana enriched worms from US (BUS1-3) as originally  
369 O1w, O2w, O3w, P1w, P2w, P3w, B1w, B2w, and B3w<sup>20</sup>. The sequence files from Dirksen et. al.  
370 was downloaded from the European Nucleotide Archive, and named as Lab Enriched worms from  
371 France (LEF1-3), Lab Enriched worms from Germany (LEG1-30), Lab Enriched worms from  
372 Portugal (LEP1), Natural worms from France (NWF1-11), Natural worms from Germany (NWG1-  
373 10) by the order of location, year and month of collection<sup>21</sup>. Consistent with these above-  
374 mentioned samples, microbiome including the tissue and gut ones from our lab is referred as N2  
375 worms from China (N2C), and microbiome in embryos isolated from our lab is referred as Emb.  
376 For the Pair-End data, the 300bp reads were truncated at any site that obtained an average quality  
377 score of <20 over a 50bp sliding window, and the truncated reads shorter than 100bp were  
378 discarded with Trimmomatic (v. 0.36)<sup>42</sup>. The truncated data were then merged with a minimum  
379 overlap of 10bp and an error matching rate of 0.1 using FLASH (v. 1.20)<sup>43</sup>. Chimeric sequences  
380 were identified and removed with UCHIME, and clean tags were clustered into operational  
381 taxonomic units (OTUs) with 97% similarity cutoff with VSEARCH (v. 2.7.1)<sup>44</sup> using the  
382 clustering method UPARSE<sup>45</sup>. OTUs were analyzed with QIIME (v. 1.8.0)<sup>46</sup> for rarefaction

383 analysis and calculation of diversity indices including Principal Coordinates Analysis (PCoA).  
384 Taxonomic classification of the representative sequence of each OTU was performed with RDP  
385 Classifier<sup>47</sup> and the Silva (release 128)<sup>48</sup> 16S rRNA database using confidence threshold of 90%.

## 386 References

- 387 1 Dougherty, E. C. & Calhoun, H. G. Possible significance of free-living nematodes in  
388 genetic research. *Nature* **161**, 29, doi:10.1038/161029a0 (1948).
- 389 2 Brenner, S. The genetics of *Caenorhabditis elegans*. *Genetics* **77**, 71-94 (1974).
- 390 3 Sulston, J. E. & Horvitz, H. R. Post-embryonic cell lineages of the nematode,  
391 *Caenorhabditis elegans*. *Dev Biol* **56**, 110-156, doi:10.1016/0012-1606(77)90158-0 (1977).
- 392 4 Sulston, J. E., Schierenberg, E., White, J. G. & Thomson, J. N. The embryonic cell lineage  
393 of the nematode *Caenorhabditis elegans*. *Dev Biol* **100**, 64-119, doi:10.1016/0012-  
394 1606(83)90201-4 (1983).
- 395 5 Fire, A. *et al.* Potent and specific genetic interference by double-stranded RNA in  
396 *Caenorhabditis elegans*. *Nature* **391**, 806-811, doi:10.1038/35888 (1998).
- 397 6 Cabreiro, F. & Gems, D. Worms need microbes too: microbiota, health and aging in  
398 *Caenorhabditis elegans*. *EMBO Mol Med* **5**, 1300-1310, doi:10.1002/emmm.201100972  
399 (2013).
- 400 7 Clark, L. C. & Hodgkin, J. *Caenorhabditis* microbiota: worm guts get populated. *BMC Biol*  
401 **14**, 37, doi:10.1186/s12915-016-0260-7 (2016).
- 402 8 DiGiulio, D. B. *et al.* Microbial prevalence, diversity and abundance in amniotic fluid  
403 during preterm labor: a molecular and culture-based investigation. *Plos One* **3**, e3056,  
404 doi:10.1371/journal.pone.0003056 (2008).
- 405 9 Jimenez, E. *et al.* Isolation of commensal bacteria from umbilical cord blood of healthy  
406 neonates born by cesarean section. *Curr Microbiol* **51**, 270-274, doi:10.1007/s00284-005-  
407 0020-3 (2005).
- 408 10 Aagaard, K. *et al.* The placenta harbors a unique microbiome. *Sci Transl Med* **6**, 237ra265,  
409 doi:10.1126/scitranslmed.3008599 (2014).
- 410 11 de Goffau, M. C. *et al.* Human placenta has no microbiome but can contain potential  
411 pathogens. *Nature* **572**, 329-334, doi:10.1038/s41586-019-1451-5 (2019).
- 412 12 Kau, A. L., Ahern, P. P., Griffin, N. W., Goodman, A. L. & Gordon, J. I. Human nutrition,  
413 the gut microbiome and the immune system. *Nature* **474**, 327-336,  
414 doi:10.1038/nature10213 (2011).
- 415 13 Tissier, H. *Recherches sur la flore intestinal des nourrisson (etat normal et pathologique)*,  
416 (1900).
- 417 14 Favier, C. F., Vaughan, E. E., De Vos, W. M. & Akkermans, A. D. Molecular monitoring  
418 of succession of bacterial communities in human neonates. *Appl Environ Microbiol* **68**,  
419 219-226, doi:10.1128/AEM.68.1.219-226.2002 (2002).
- 420 15 Sonnenburg, E. D. *et al.* Diet-induced extinctions in the gut microbiota compound over  
421 generations. *Nature* **529**, 212-215, doi:10.1038/nature16504 (2016).

- 422 16 McFall-Ngai, M. *et al.* Animals in a bacterial world, a new imperative for the life sciences.  
423 *Proc Natl Acad Sci U S A* **110**, 3229-3236, doi:10.1073/pnas.1218525110 (2013).
- 424 17 Chalfie, M., Tu, Y., Euskirchen, G., Ward, W. W. & Prasher, D. C. Green fluorescent  
425 protein as a marker for gene expression. *Science* **263**, 802-805,  
426 doi:10.1126/science.8303295 (1994).
- 427 18 Zhang, F. *et al.* *Caenorhabditis elegans* as a Model for Microbiome Research. *Front*  
428 *Microbiol* **8**, 485, doi:10.3389/fmicb.2017.00485 (2017).
- 429 19 Zhang, J., Holdorf, A. D. & Walhout, A. J. C. *elegans* and its bacterial diet as a model for  
430 systems-level understanding of host-microbiota interactions. *Curr Opin Biotechnol* **46**, 74-  
431 80, doi:10.1016/j.copbio.2017.01.008 (2017).
- 432 20 Berg, M. *et al.* Assembly of the *Caenorhabditis elegans* gut microbiota from diverse soil  
433 microbial environments. *ISME J* **10**, 1998-2009, doi:10.1038/ismej.2015.253 (2016).
- 434 21 Dirksen, P. *et al.* The native microbiome of the nematode *Caenorhabditis elegans*: gateway  
435 to a new host-microbiome model. *BMC Biol* **14**, 38, doi:10.1186/s12915-016-0258-1  
436 (2016).
- 437 22 Han, B. *et al.* Microbial Genetic Composition Tunes Host Longevity. *Cell* **169**, 1249-1262  
438 e1213, doi:10.1016/j.cell.2017.05.036 (2017).
- 439 23 Funkhouser, L. J. & Bordenstein, S. R. Mom knows best: the universality of maternal  
440 microbial transmission. *PLoS Biol* **11**, e1001631, doi:10.1371/journal.pbio.1001631  
441 (2013).
- 442 24 Sinnathamby, G. *et al.* The bacterial community associated with the sheep gastrointestinal  
443 nematode parasite *Haemonchus contortus*. *Plos One* **13**, e0192164,  
444 doi:10.1371/journal.pone.0192164 (2018).
- 445 25 Amann, R. I. *et al.* Combination of 16S rRNA-targeted oligonucleotide probes with flow  
446 cytometry for analyzing mixed microbial populations. *Appl Environ Microbiol* **56**, 1919-  
447 1925 (1990).
- 448 26 Daims, H., Bruhl, A., Amann, R., Schleifer, K. H. & Wagner, M. The domain-specific  
449 probe EUB338 is insufficient for the detection of all Bacteria: development and evaluation  
450 of a more comprehensive probe set. *Syst Appl Microbiol* **22**, 434-444, doi:10.1016/S0723-  
451 2020(99)80053-8 (1999).
- 452 27 Kim, Y. & Mylonakis, E. *Caenorhabditis elegans* immune conditioning with the probiotic  
453 bacterium *Lactobacillus acidophilus* strain NCFM enhances gram-positive immune  
454 responses. *Infect Immun* **80**, 2500-2508, doi:10.1128/IAI.06350-11 (2012).
- 455 28 Li, Z. J., Zhang, S. C. & Liu, Q. H. Vitellogenin Functions as a Multivalent Pattern  
456 Recognition Receptor with an Opsonic Activity. *Plos One* **3**, doi:ARTN  
457 e194010.1371/journal.pone.0001940 (2008).
- 458 29 Sharrock, W. J., Sutherlin, M. E., Leske, K., Cheng, T. K. & Kim, T. Y. Two distinct yolk  
459 lipoprotein complexes from *Caenorhabditis elegans*. *J Biol Chem* **265**, 14422-14431 (1990).
- 460 30 Vandekerckhove, T. T., Coomans, A., Cornelis, K., Baert, P. & Gillis, M. Use of the  
461 *Verrucomicrobia*-specific probe EUB338-III and fluorescent in situ hybridization for  
462 detection of "*Candidatus Xiphinematobacter*" cells in nematode hosts. *Appl Environ*  
463 *Microbiol* **68**, 3121-3125, doi:10.1128/AEM.68.6.3121-3125.2002 (2002).

- 464 31 Treonis, A. M., Michelle, E. H., O'Leary, C. A., Austin, E. E. & Marks, C. B. Identification  
465 and localization of food-source microbial nucleic acids inside soil nematodes. *Soil Biol*  
466 *Biochem* **42**, 2005-2011, doi:10.1016/j.soilbio.2010.07.026 (2010).
- 467 32 Greiman, S. E., Tkach, M., Vaughan, J. A. & Tkach, V. V. Laboratory maintenance of the  
468 bacterial endosymbiont, *Neorickettsia* sp., through the life cycle of a digenean, *Plagiorchis*  
469 *elegans*. *Exp Parasitol* **157**, 78-83, doi:10.1016/j.exppara.2015.06.015 (2015).
- 470 33 Grant, B. & Hirsh, D. Receptor-mediated endocytosis in the *Caenorhabditis elegans* oocyte.  
471 *Mol Biol Cell* **10**, 4311-4326, doi:10.1091/mbc.10.12.4311 (1999).
- 472 34 Perez, M. F. & Lehner, B. Vitellogenins - Yolk Gene Function and Regulation in  
473 *Caenorhabditis elegans*. *Front Physiol* **10**, 1067, doi:10.3389/fphys.2019.01067 (2019).
- 474 35 Kissoyan, K. A. B. *et al.* Natural *C. elegans* Microbiota Protects against Infection via  
475 Production of a Cyclic Lipopeptide of the Viscosin Group. *Curr Biol* **29**, 1030-1037 e1035,  
476 doi:10.1016/j.cub.2019.01.050 (2019).
- 477 36 Montalvo-Katz, S., Huang, H., Appel, M. D., Berg, M. & Shapira, M. Association with  
478 soil bacteria enhances p38-dependent infection resistance in *Caenorhabditis elegans*. *Infect*  
479 *Immun* **81**, 514-520, doi:10.1128/IAI.00653-12 (2013).
- 480 37 Fischer, M., Regitz, C., Kull, R., Boll, M. & Wenzel, U. Vitellogenins increase stress  
481 resistance of *Caenorhabditis elegans* after *Photorhabdus luminescens* infection depending  
482 on the steroid-signaling pathway. *Microbes Infect* **15**, 569-578,  
483 doi:10.1016/j.micinf.2013.05.002 (2013).
- 484 38 Perez, M. F., Francesconi, M., Hidalgo-Carcedo, C. & Lehner, B. Maternal age generates  
485 phenotypic variation in *Caenorhabditis elegans*. *Nature* **552**, 106-109,  
486 doi:10.1038/nature25012 (2017).
- 487 39 Bordenstein, S. R. & Theis, K. R. Host Biology in Light of the Microbiome: Ten Principles  
488 of Holobionts and Hologenomes. *PLoS Biol* **13**, e1002226,  
489 doi:10.1371/journal.pbio.1002226 (2015).
- 490 40 Pradeu, T. A mixed self: The role of symbiosis in development. *Biological Theory* **6**, 80-  
491 88 (2011).
- 492 41 Seo, B. & Lee, J. Observation and Quantification of Telomere and Repetitive Sequences  
493 Using Fluorescence In Situ Hybridization (FISH) with PNA Probes in *Caenorhabditis*  
494 *elegans*. *J Vis Exp*, doi:10.3791/54224 (2016).
- 495 42 Bolger, A. M., Lohse, M. & Usadel, B. Trimmomatic: a flexible trimmer for Illumina  
496 sequence data. *Bioinformatics* **30**, 2114-2120, doi:10.1093/bioinformatics/btu170 (2014).
- 497 43 Magoc, T. & Salzberg, S. L. FLASH: fast length adjustment of short reads to improve  
498 genome assemblies. *Bioinformatics* **27**, 2957-2963, doi:10.1093/bioinformatics/btr507  
499 (2011).
- 500 44 Rognes, T., Flouri, T., Nichols, B., Quince, C. & Mahe, F. VSEARCH: a versatile open  
501 source tool for metagenomics. *PeerJ* **4**, e2584, doi:10.7717/peerj.2584 (2016).
- 502 45 Edgar, R. C. UPARSE: highly accurate OTU sequences from microbial amplicon reads.  
503 *Nat Methods* **10**, 996-998, doi:10.1038/nmeth.2604 (2013).
- 504 46 Caporaso, J. G. *et al.* QIIME allows analysis of high-throughput community sequencing  
505 data. *Nat Methods* **7**, 335-336, doi:10.1038/nmeth.f.303 (2010).



506 47 Wang, Q., Garrity, G. M., Tiedje, J. M. & Cole, J. R. Naive Bayesian classifier for rapid  
507 assignment of rRNA sequences into the new bacterial taxonomy. *Appl Environ Microbiol*  
508 **73**, 5261-5267, doi:10.1128/AEM.00062-07 (2007).

509 48 Quast, C. *et al.* The SILVA ribosomal RNA gene database project: improved data  
510 processing and web-based tools. *Nucleic Acids Res* **41**, D590-596,  
511 doi:10.1093/nar/gks1219 (2013).

512 **Acknowledgments** This work was supported by the National Laboratory of Biomacromolecules,  
513 Institute of Biophysics, Chinese Academy of Sciences (2018kf09). We thank Prof. Guangshuo Ou  
514 in Tsinghua University, Prof. Yanling Hao in China Agricultural University, and Dr. Kun Zhu in  
515 the Institute of Microbiology, Chinese Academy of Science for offering *C. elegans* worms and  
516 bacteria strains, Ms. Yun Feng, Xixia Li, Xueke Tan, Li Wang, and Yan Teng in the Center for  
517 Biological Imaging (CBI), Institute of Biophysics, Chinese Academy of Sciences for their help in  
518 electron and microscopic imaging, Prof. Hong Zhang and Ms. Huichao Deng in Institute of  
519 Biophysics, Chinese Academy of Sciences for discussion. The authors are grateful to Prof. Chih-  
520 chen Wang in Institute of Biophysics, Chinese Academy of Sciences for her support and  
521 encouragement in our research.

522 **Author contributions** D.Y. conceived and designed the project. J.Z., X.M., and J.F. carried out  
523 the study, overseen by D.Y. and both analyzed the data. D.Y. wrote the manuscript. All authors  
524 read and approved the manuscript.

525 **Competing interests** The authors declare on competing interests.

526 **Correspondence and requests for materials** should be addressed to D.Y.

527

## Figure legends

528 Fig. 1 **Vertical transmission of bacteria in *C. elegans***. **a**, the confocal microscopic image of  
529 worm embryos inside a hermaphrodite, blue is the DAPI stained worm cell and green is the probe  
530 labelled bacterial DNA. **b**, volumetric reconstruction of the worm embryos. Scale bars indicate  
531 5µm. **c**, the Bray-Curtis PCoA of worldwide *C. elegans* microbiota, x-axis is 11.12% explained  
532 variance and y-axis is 8.2% explained variance. N2C (n=5) is the N2 nematode in Chinese labs.  
533 LEF and NWF (n=14) are lab enriched and natural wild worms in France. LEG and NWG (n=40)  
534 are lab enriched and natural wild worms in Germany. LEP (n=1) is lab enriched worm in Portugal.  
535 BUS, OUS, and PUS (n=9) are banana, orange, and potato fed worms in the U.S.. Emb (n=3) is  
536 the worm embryo in Chinese labs. **d**, the locations of worm samples in **c**. Red indicates China,  
537 blue indicates U.S., black in indicates France, yellow indicates Germany, and green indicates  
538 Portugal. **e**, core OTUs across 50%-100% of all the samples in the above. **f**, Venn diagram of  
539 common bacteria in the level of genus of all the samples in the above. **g**, bacterial composition in  
540 the level of order, the groups are the same as in **c**.

541 Fig. 2 **Tissue bacteria in *C. elegans***. **a**, FISH of tissue bacteria in a hermaphrodite under confocal  
542 microscope, blue is the DAPI stained worm cell and green is the probe labelled bacteria DNA. **b**,  
543 FISH of tissue bacteria in a male under confocal microscope. **c**, FISH of organs in a hermaphrodite,  
544 from left to right are embryos, spermatheca, dorsal and ventral body wall muscle. **d**, FISH of  
545 organs in a male worm, from left to right are the gonad, dorsal and ventral body wall muscle. Color  
546 in **b-d** are the same as in **a**. Scale bars indicate 30µm. **e**, CLEM of tissue microbiota in a  
547 hermaphrodite embryo, upper left is the FISH image of bacteria in the embryos, lower left is the  
548 SEM image of the same site and whit arrow indicates the corresponding position of the  
549 fluorescence signal. Right is the overlay of light and electron microscopy, and green is the anti-  
550 digoxin antibody labelled bacteria. **f**, CLEM of tissue microbiota in a male worm yolk, upper left  
551 is the FISH of bacteria in the yolk, lower left is the SEM of the same site, and right is the overlay.  
552 Green indicates the same as in **e**.

553 Fig. 3 **Tissue bacteria related immunity in *C. elegans***. **a**, life span of worms treated with different  
554 antibiotics including ampicillin, kanamycin, chloramphenicol with saline as the control, and under  
555 the challenge of *Pseudomonas aeruginosa*. Worms treated with kanamycin and chloramphenicol  
556 exhibited significantly shortened life span compared with the control group (Log-rank test,

557  $p < 0.0001$ ). **b**, Bray-Curtis PCoA of the tissue microbiota in different antibiotic treated *C. elegans*,  
558 x-axis is 41.0% explained variance and y-axis is 22.0% explained variance. Green indicates saline,  
559 purple indicates ampicillin, red indicates kanamycin, and blue indicates chloramphenicol treated  
560 worms. **c-d**, corresponding analysis of different antibiotic treated worms, then replenished with  
561 tissue bacteria. There is no significant difference among life spans of different antibiotic treated  
562 worms in **c**. **e-f**, the top 15 tissue bacterial composition at the order level of the antibiotic treated  
563 worms, and the antibiotic treated, then tissue bacteria replenished worms, respectively. The groups  
564 are the same as in **a**.

565 Fig. 4 **Vitellogenin mediated vertical microbiota transmission in *C. elegans***. **a**, life span of  
566 RNAi worms under the challenge of *Pseudomonas aeruginosa*. Green, purple, red, and blue  
567 indicate worms were fed with *E. coli* OP50, *E. coli* HT115, *E. coli* HT115 harboring empty vector,  
568 and *E. coli* HT115 harboring *Vit-2* RNAi plasmid. There is no statistical significance among the  
569 life spans of differently treated worms **b**, Bray-Curtis PCoA of the tissue microbiota in different  
570 RNAi treated *C. elegans*, x-axis is 58.1% explained variance and y-axis is 16.2% explained  
571 variance. Purple indicates worms fed with *E. coli* HT115 and blue indicate worms fed with *E. coli*  
572 HT115 harboring *Vit-2* RNAi plasmids. **c**, top 15 bacterial composition at the order level, the  
573 groups are the same as in **b**. **d-f** same analysis of the progeny of worms treated with RNAi. Progeny  
574 of worms fed with *E. coli* HT115 harboring *Vit-2* RNAi plasmids exhibited significantly shortened  
575 life span compared with the other groups (Log-rank test, \*indicates  $p < 0.05$  and \*\* indicates  
576  $p < 0.01$ ). **g-i**, same analysis of progeny of worms treated with RNAi then replenished with tissue  
577 bacteria. There is no statistical significance among the life spans of differently treated worms in **g**.

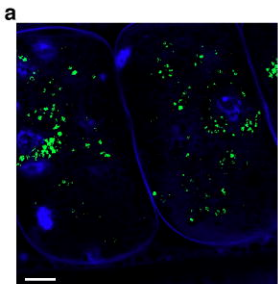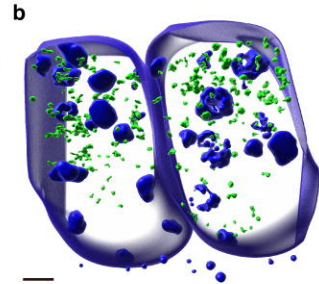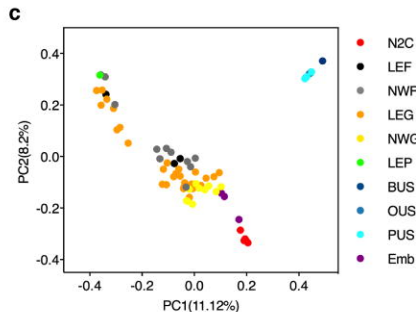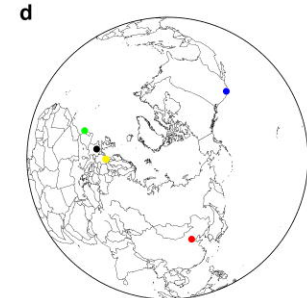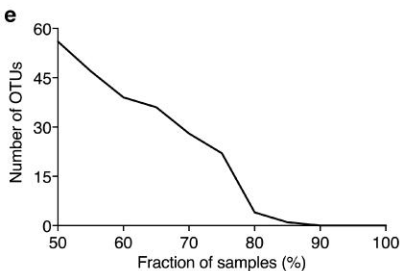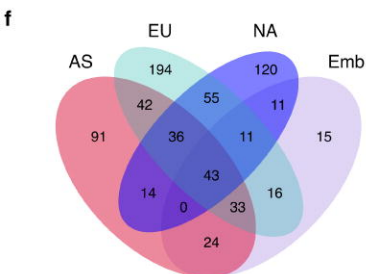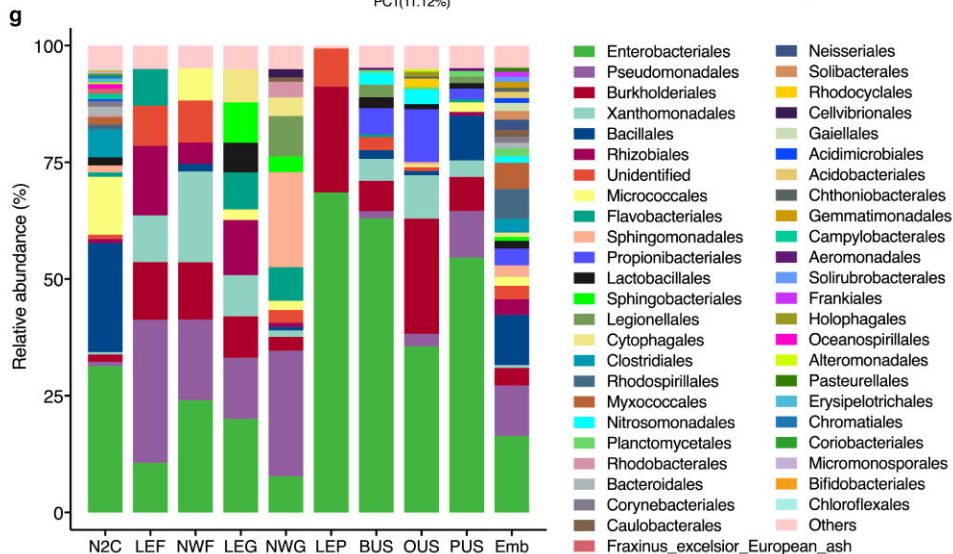

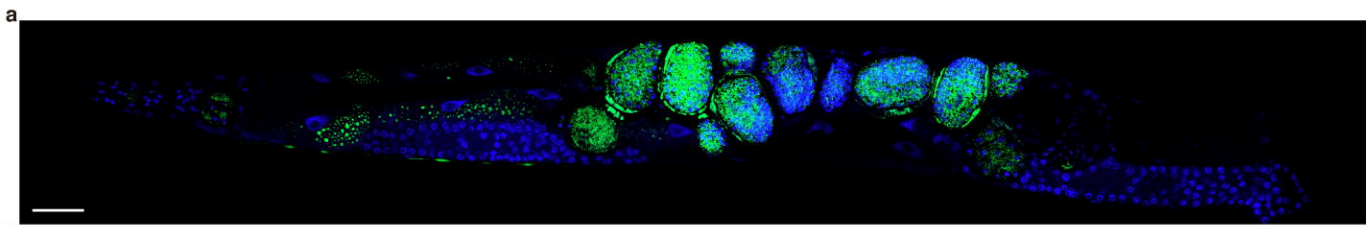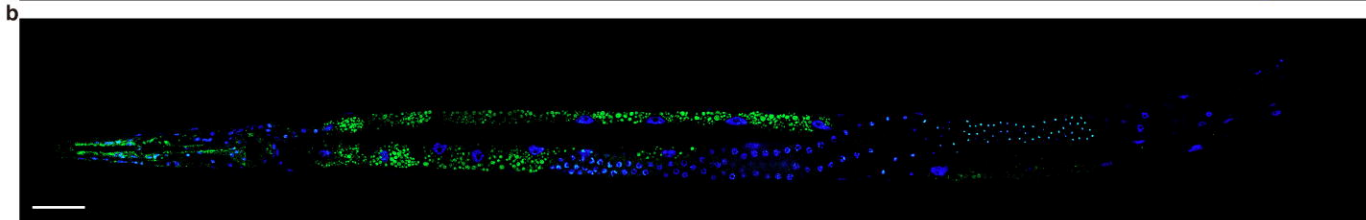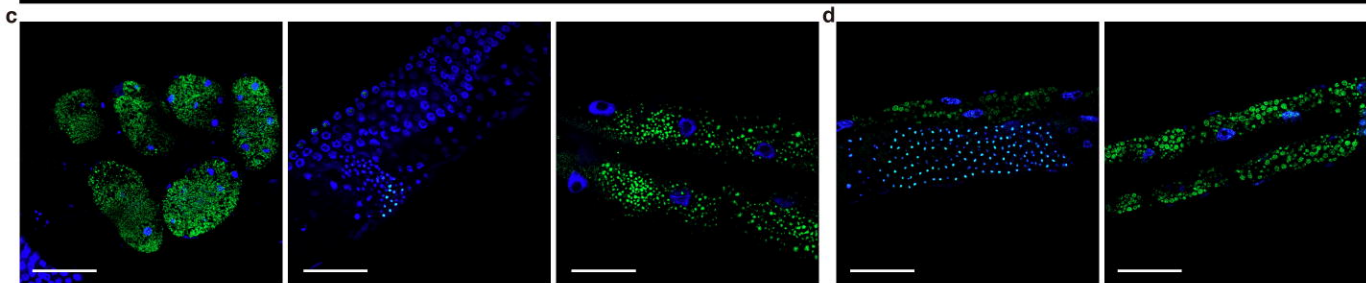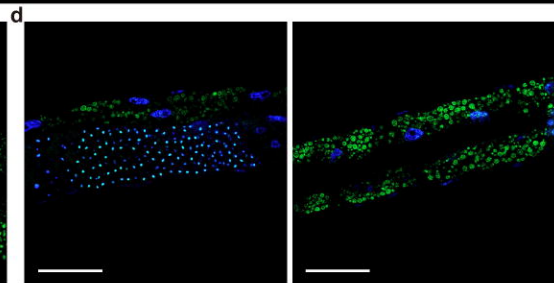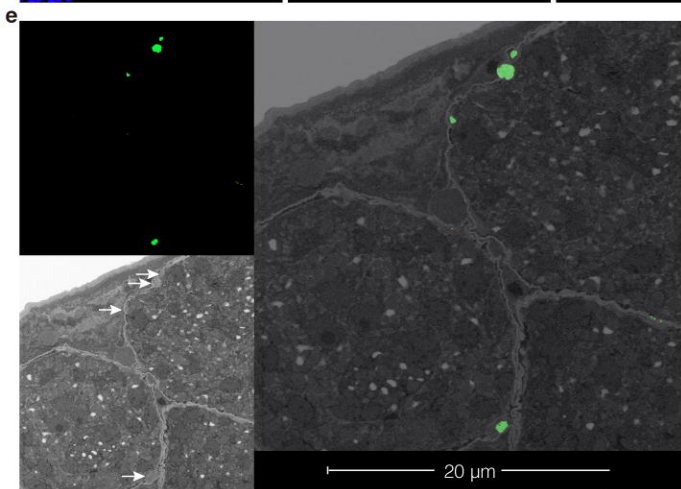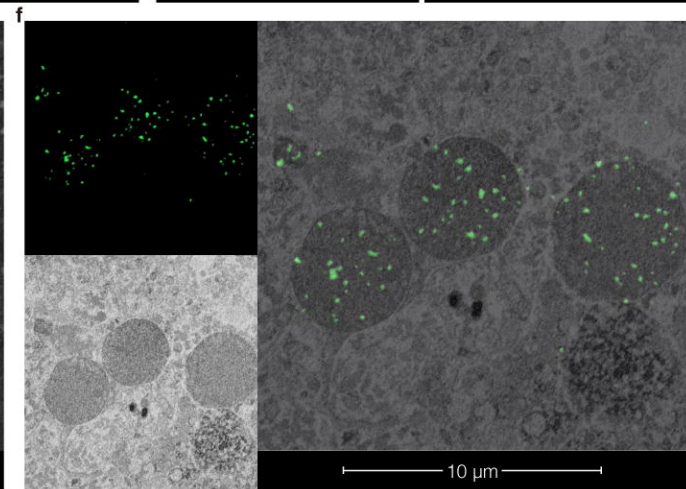

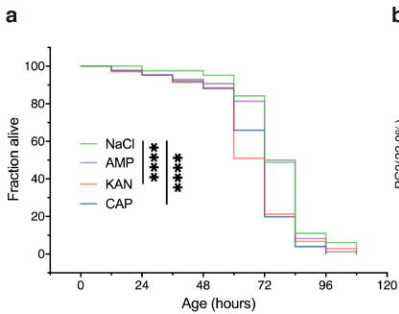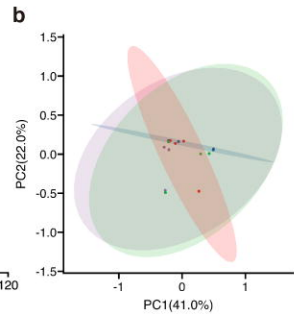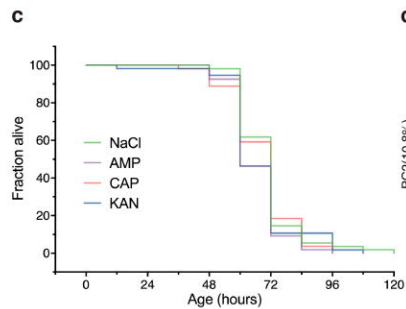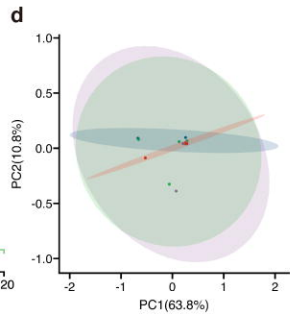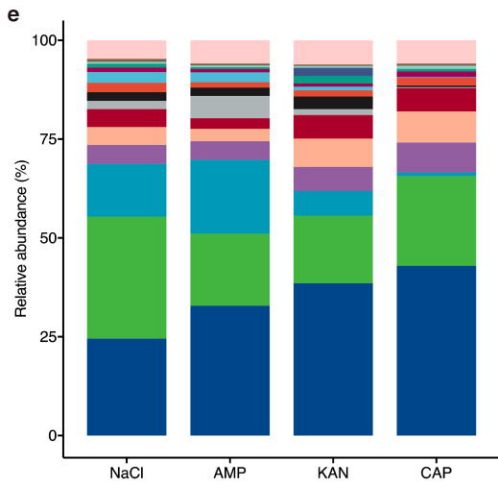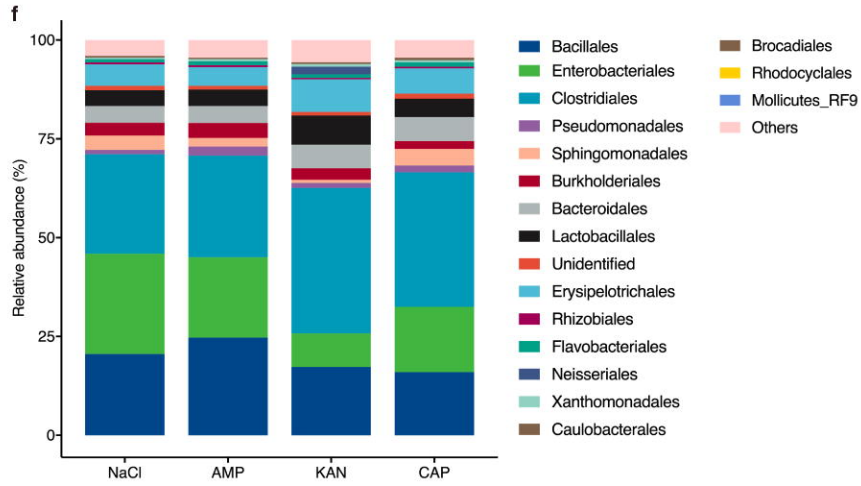

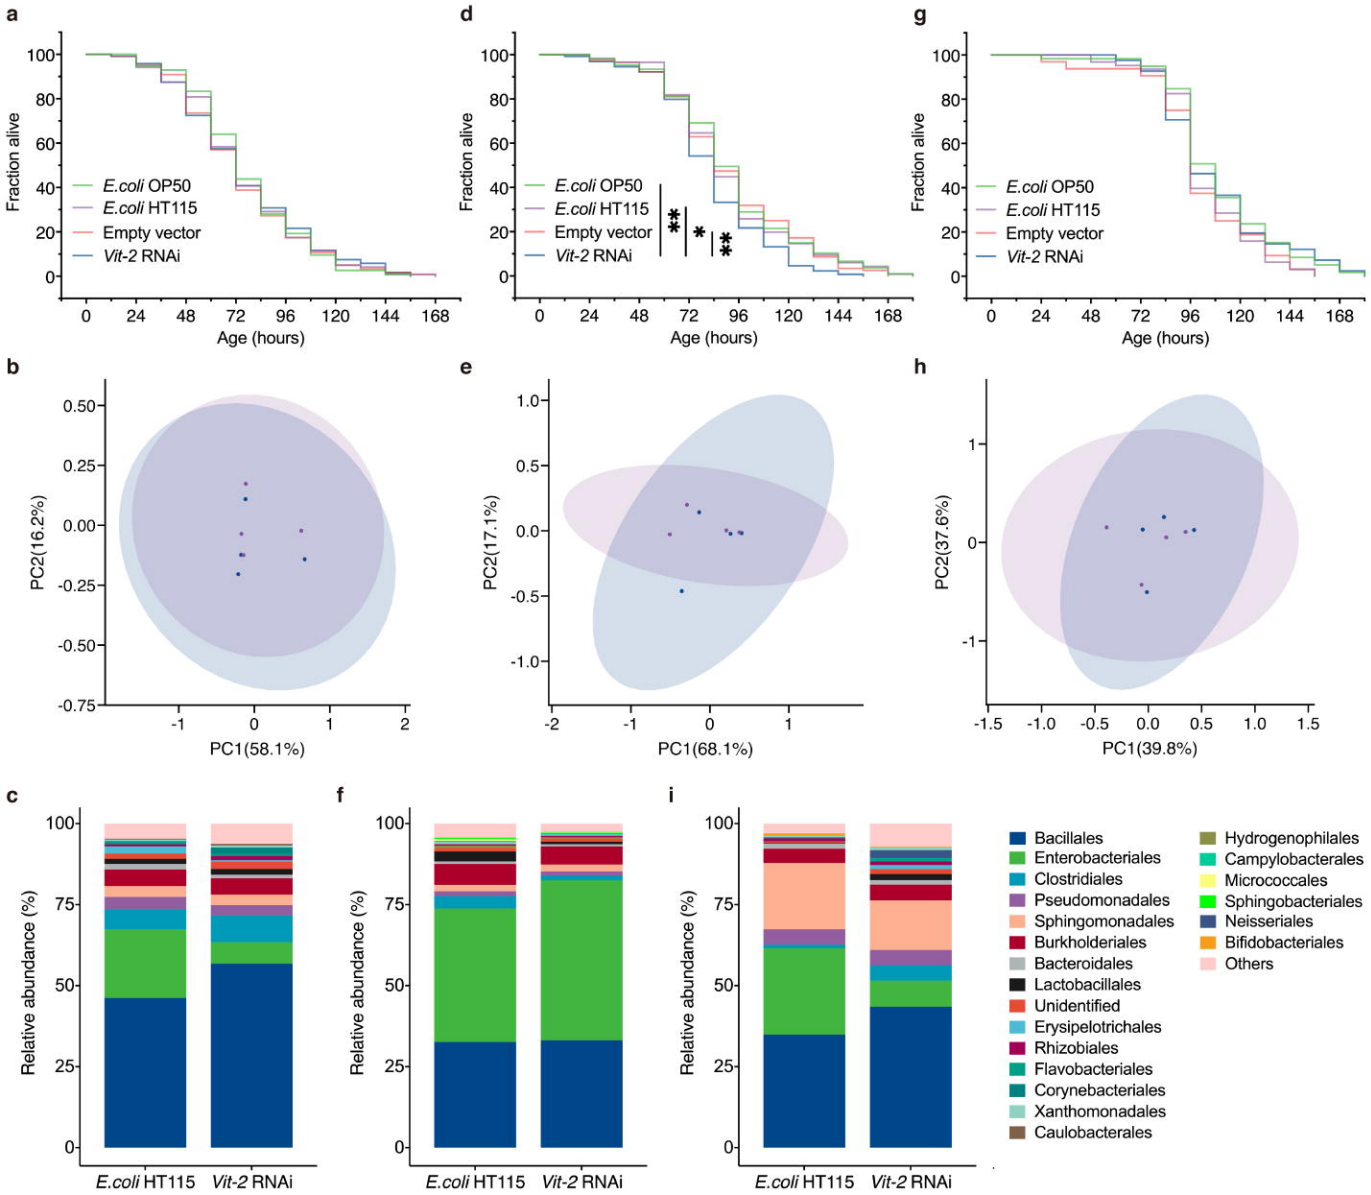

Source: https://www.biorxiv.org/content/10.1101/2021.12.06.471348v1.full.pdf
